# Supplementary material for: The nuclear receptor NOR-1 regulates the small muscle protein, X-linked (SMPX) and myotube differentiation
Source: PubMed Central journal article supplement (PMC4867575; doi:10.1038/srep25944), 2016-05-16
Supplement: srep25944-s1.pdf [file srep25944-s1.pdf]

## Supplementary Information

### **The nuclear receptor NOR-1 regulates the small muscle protein, X-linked (SMPX) and myotube differentiation**

Beatriz Ferrán<sup>1</sup>, Ingrid Martí-Pàmies<sup>1</sup>, Judith Alonso<sup>1</sup>, Ricardo Rodríguez-Calvo<sup>1</sup>, Silvia Aguiló<sup>1</sup>, Francisco Vidal<sup>2</sup>, Cristina Rodríguez<sup>1\*</sup> & José Martínez-González<sup>1\*</sup>

<sup>1</sup>Centro de Investigación Cardiovascular, CSIC-ICCC, IIB-Sant Pau, c/Sant Antoni Maria Claret 167, 08025 Barcelona, Spain. <sup>2</sup>Unitat de Diagnòstic i Teràpia Molecular, Banc de Sang i Teixits, Passeig Vall d'Hebron 119-129, Barcelona 08035, Spain.

\* The last two authors contributed equally to this work

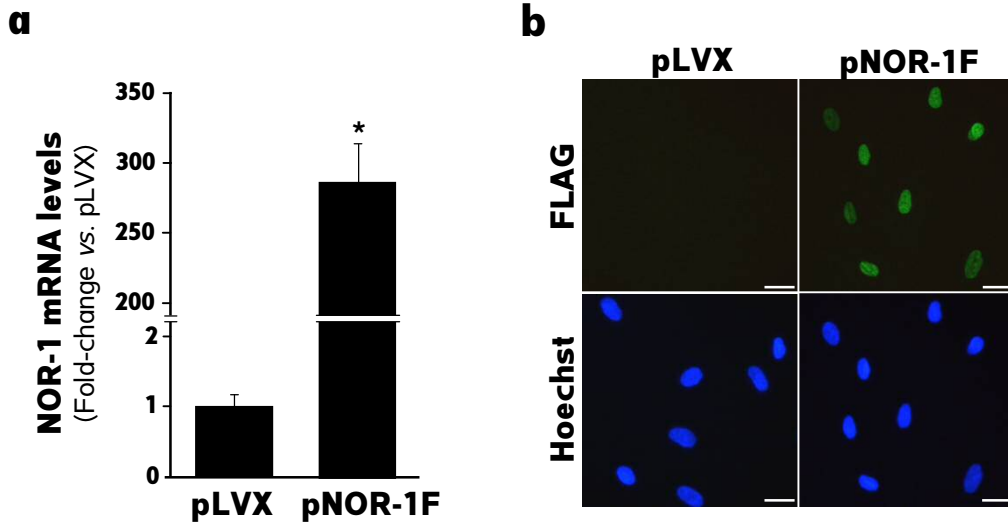

**Supplementary Fig. S1. Lentiviral over-expression of NOR-1 in human VSMC.** (a) Human VSMC were transduced with pLVX or pLVX/NOR-1-FLAG (pNOR-1F) lentivirus, and NOR-1 over-expression was verified by real-time PCR (n = 6). \*P < 0.0001 vs. cells transduced with pLVX. (b) Immunocytochemical analysis for NOR-1 using an antibody against the FLAG sequence (FLAG), from cells transduced as indicated in (a). Bottom panels: fluorescent labelling of nuclei using Hoechst. Bars: 25  $\mu$ m.

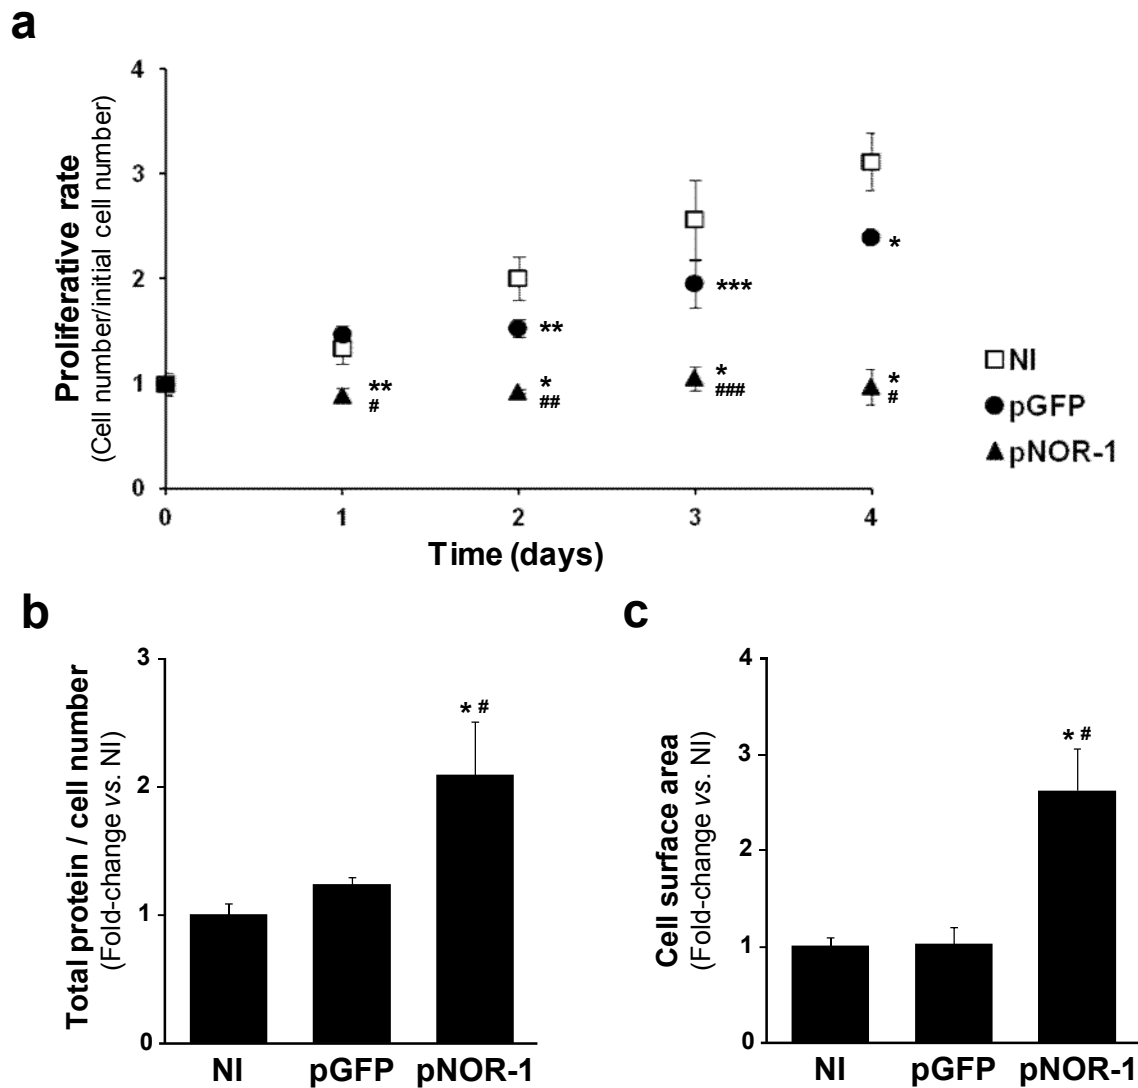

**Supplementary Fig. S2. Lentiviral NOR-1 over-expression reduces VSMC proliferative rate and promotes VSMC hypertrophy.** (a) VSMC were transduced with a lentiviral vector to over-express NOR-1 (pLVX/NOR-1; pNOR-1), or a control lentiviral vector expressing EGFP (pLVX/EGFP; pGFP), and the proliferative rate of VSMC cultures was determined by daily cell counting. Non-infected cells (NI) were used as a control. (b and c) Relative cellular protein content (total protein content/ cell number) (b) and relative cell surface area (c) of VSMC treated as indicated in (a). \*, \*\*, \*\*\*,  $P < 0.0001$ ,  $P = 0.002$ ,  $P = 0.0077$ , respectively vs. NI. #, ##, ###,  $P < 0.0001$ ,  $P = 0.0003$ ,  $P = 0.0006$ , respectively vs. pGFP.

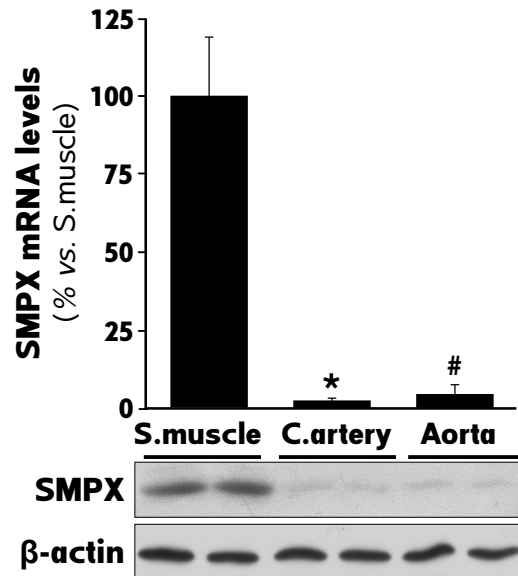

**Supplementary Fig. S3. SMPX is expressed in human arteries.** (a) SMPX mRNA levels determined by real-time PCR in human skeletal muscle (S. muscle; n = 4), and human vessels: coronary arteries (C. artery; n = 7) and aorta (n = 6). Data are expressed as mean  $\pm$  s.e.m. \*P = 0.0001 and #P = 0.0003 vs. S. muscle. (b) Representative Western blot showing SMPX protein levels in these tissues. Levels of  $\beta$ -actin were used as a loading control in Western blot experiments.

**a**

**NBRE c.s. TGACCTTT**  
| | | | | | | |

|                   |                                                                            |
|-------------------|----------------------------------------------------------------------------|
| <b>Human</b>      | AAGTAAGATACCATAGCCACCTCCCGGCT <b>TGACATTT</b> GAGC-CTGCTTTCCGCACGGTCAAGCCT |
| <b>Orangutan</b>  | AAGTAAGATACCATAGCCACCTCCCGGCT <b>TGACATTT</b> GAGC-gcttTccgCaCggtcaggccttT |
| <b>Chimpanzee</b> | AAGTAAGATACCATAGCCACCTCCCGGCT <b>TGACATTT</b> GAGC-gcttTccgCaCggtcaagccttT |
| <b>Gorilla</b>    | AAGTAAGATACCATAGCCACCTCCCGGCT <b>TGACATTT</b> GAGC-gcttTccgCaCggtcaagccttT |
| <b>Cow</b>        | A-GTAAGATtCCAgAGCCACCTtCCGGCT <b>TGACATTT</b> GAGCcCTGCTTTCaGCACGGTCAAGCCT |
| <b>Pig</b>        | A-GTAAGATtCCgTAGCCACCTtCCGGCT <b>TGACATTT</b> GAGCcCTGCTTTCaGCACGGTCAAGCCT |
| <b>Mouse</b>      | A-GaAAGATAaCgTAGCCACCTCaGGCT <b>TGA</b> tATcTGAGCcCTGCTTTCaCACGGTCAAGCCT   |
| <b>Rat</b>        | A-GTAAGATAaCgTAGCCACCTCaGCT <b>TGA</b> tATcTGAGCcCTGCTTTCaCAtGGTCAAGCCT    |

**b**

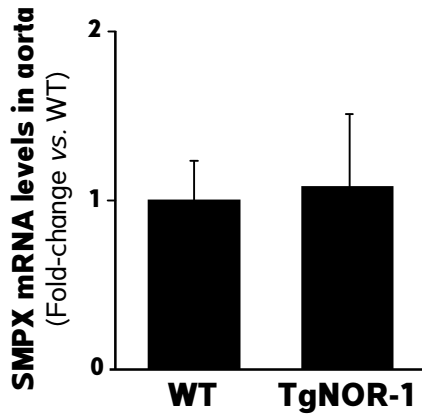

**c**

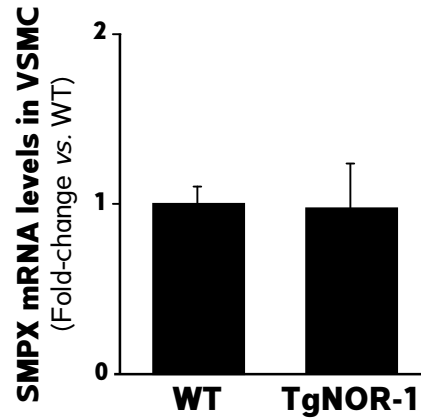

**Supplementary Fig. S4. SMPX does not seem to be regulated by NOR-1 in mouse.** (a) Alignment of the proximal region corresponding to the SMPX promoter from different species including human and mouse. Non-conserved positions are indicated in lower case. The NBRE consensus sequence (NBRE c.s.) is shown at the top. (b and c) SMPX was not regulated by NOR-1 transgenesis in mice. SMPX mRNA levels were analyzed by real-time PCR in mouse aorta from wild-type (WT; n = 7) and transgenic mice that specifically over-express human NOR-1 in VSMC (TgNOR-1; n = 9) (b), and in cultures of VSMC from these animals (n = 6) (c). Data are expressed as mean  $\pm$  s.e.m.

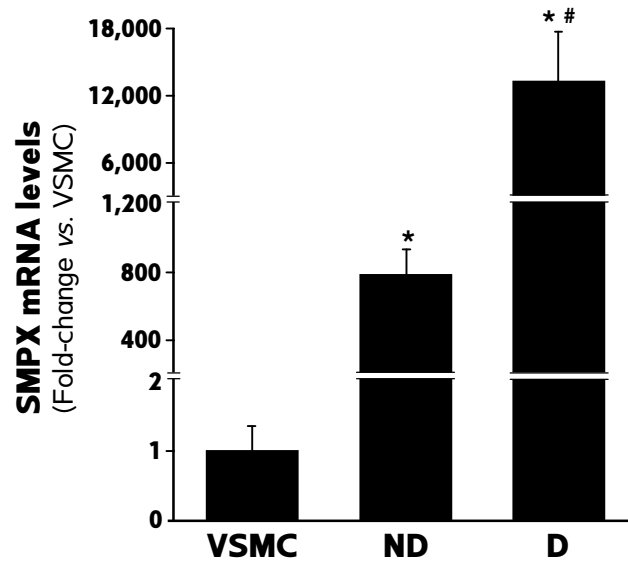

**Supplementary Fig. S5. SMPX is highly expressed in HSMM.** mRNA levels of SMPX (analysed by real-time PCR) in human VSMC, and in HSMM non-differentiated (ND) and differentiated (D) to myotubes (after the exposition to 2% horse serum during five days) (n = 6). \*P < 0.0001 vs. VSMC; #P < 0.0001 vs. ND.

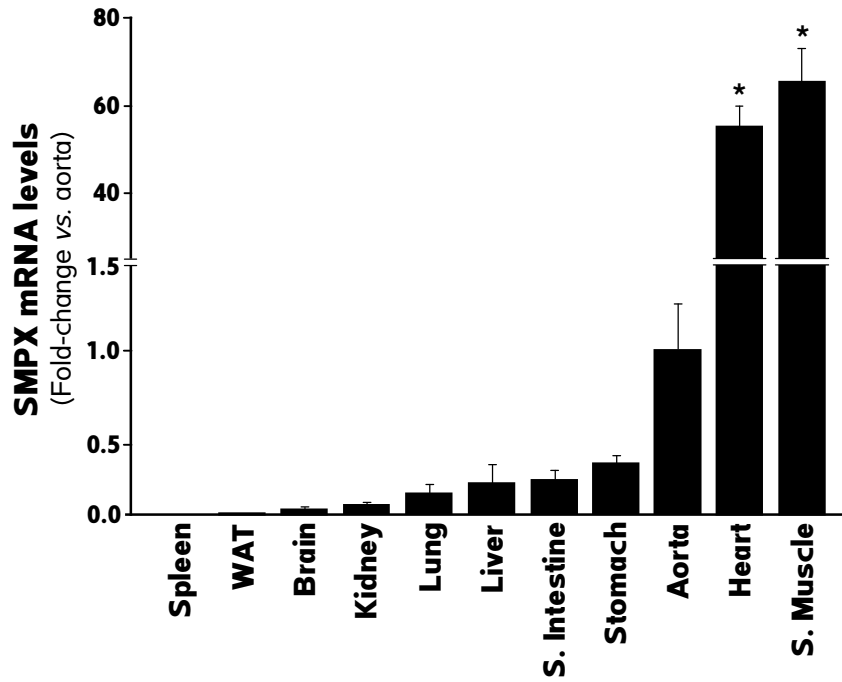

**Supplementary Fig. S6. SMPX expression in mouse tissues.** Expression levels of SMPX analysed by real-time PCR in a set of mouse tissues. WAT: white adipose tissue; S. intestine: small intestine; S. muscle: skeletal muscle. Data are expressed as mean  $\pm$  s.e.m. (n = 7). \*P < 0.0001 vs. aorta.
